# Supplementary material for: Mesoporous In2O3nanofibers assembled by ultrafine nanoparticles as a high capacity anode for Li-ion batteries
Source: Royal Society of Chemistry journal article supplement (doi:10.1039/c6ra07804d), 2016-01-01
Supplement: c6ra07804d1.pdf [file c6ra07804d1.pdf]

## Electronic Supplementary Information (ESI)

Mesoporous  $\text{In}_2\text{O}_3$  nanofibers assembled by ultrafine  
nanoparticles as high capacity anode of Li-ion batteries

Yong Zhang<sup>\*a</sup>, Chunhai Jiang<sup>a</sup>, Shuxin Zhuang<sup>a</sup>, Mi Lu<sup>a</sup> and  
Yongcan Cai<sup>a</sup>

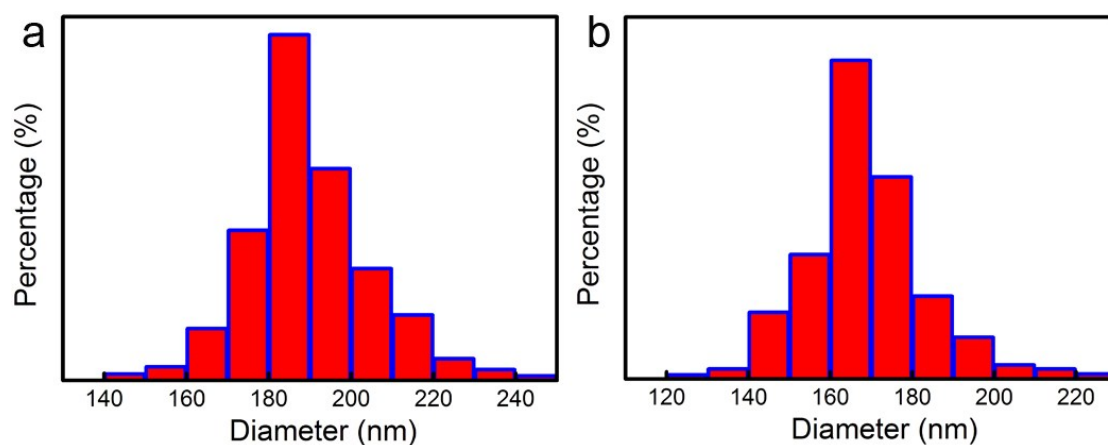

Figure S1. Diameter distributions of (a) the  $\text{In}(\text{NO}_3)_3 \cdot 5\text{H}_2\text{O}/\text{PVP}$  and (b)  $\text{In}_2\text{O}_3$  nanofibers.
